# Supplementary material for: Improving Drought Tolerance in Mungbean (Vigna radiata L. Wilczek): Morpho-Physiological, Biochemical and Molecular Perspectives
Source: MDPI journal article supplement (doi:10.3390/agronomy11081534), 2021-07-30
Supplement: s1 [file s1]

**Table S1.** Potential candidate genes and transcriptional factors conferring drought tolerance in other model plants.

| Sl. N. | Candidate genes                                                         | Isolated/ expressed         | Stress condition                           | References |
|--------|-------------------------------------------------------------------------|-----------------------------|--------------------------------------------|------------|
| 1      | AtDREB1A, AtDREB2A                                                      | <i>Arabidopsis thaliana</i> | Drought                                    | [1,2]      |
| 2      | <i>AtbZIP36</i>                                                         | <i>A. thaliana</i>          | Drought                                    | [3]        |
| 3      | <i>ABF2</i>                                                             | <i>A. thaliana</i>          | Drought                                    | [4,5]      |
| 4      | <i>ABF3</i>                                                             | <i>A. thaliana</i>          | Drought                                    | [6]        |
| 5      | <i>ABF4</i>                                                             | <i>A. thaliana</i>          | Drought                                    | [6]        |
| 6      | <i>AtMYC2, AtMYB2</i>                                                   | <i>Arabidopsis thaliana</i> | Osmotic stress                             | [7]        |
| 7      | OsDREB1A                                                                | <i>A. thaliana</i>          | Drought                                    | [8]        |
| 8      | AtNAC2, AtNAC019,<br>AtNAC055, CBF4,<br>AtNAC019, AtNAC055,<br>AtNAC072 | <i>A. thaliana</i>          | Drought                                    | [9]        |
| 9      | OsMYB4                                                                  | <i>A. thaliana</i>          | Drought                                    | [10]       |
| 10     | Zat12                                                                   | <i>A. thaliana</i>          | Osmotic stress                             | [11]       |
| 11     | MYB15                                                                   | <i>A. thaliana</i>          | Drought                                    | [12]       |
| 12     | OsMYB3R-2                                                               | <i>A. thaliana</i>          | Drought                                    | [13]       |
| 13     | ZmDREB2A                                                                | <i>A. thaliana</i>          | Drought                                    | [14]       |
| 14     | AtAF1                                                                   | <i>A. thaliana</i>          | Drought                                    | [15]       |
| 15     | OsDREB1F                                                                | <i>A. thaliana</i>          | Drought                                    | [16]       |
| 16     | OsWRKY45                                                                | <i>A. thaliana</i>          | Drought                                    | [17]       |
| 17     | OsDREB2B                                                                | <i>A. thaliana</i>          | Drought                                    | [18]       |
| 18     | <i>AtHsfA3, AtHsfA39</i>                                                | <i>A. thaliana</i>          | Drought                                    | [19]       |
| 19     | <i>HSP70</i>                                                            | <i>A. thaliana</i>          | Drought                                    | [20]       |
| 20     | CDPK                                                                    | <i>Glycine max</i>          | Enhance water permeability                 | [21]       |
| 21     | <i>GmDREBa, GmDREBb, GmDREBc</i>                                        | <i>G. max</i>               | Drought                                    | [22]       |
| 22     | <i>GmCaM4</i>                                                           | <i>G. max</i>               | Drought                                    | [23]       |
| 23     | <i>GmDREB2</i>                                                          | <i>G. max</i>               | Drought                                    | [24]       |
| 24     | <i>GmbZIP44, GmbZIP62, GmbZIP78</i>                                     | <i>G. max</i>               | Drought                                    | [25]       |
| 25     | <i>GmbZIP132</i>                                                        | <i>G. max</i>               | Drought                                    | [26]       |
| 26     | <i>GmMYB177</i>                                                         | <i>G. max</i>               | Drought                                    | [27]       |
| 27     | <i>GmDREB2</i>                                                          | <i>G. max</i>               | Drought                                    | [28]       |
| 28     | <i>GmFDL19</i>                                                          | <i>G. max</i>               | Drought                                    | [29]       |
| 29     | <i>GmSK1</i>                                                            | <i>G. max</i>               | Drought                                    | [30]       |
| 30     | <i>PgTIP1</i>                                                           | <i>G. max</i>               | Drought                                    | [31]       |
| 31     | <i>GmRACK1</i>                                                          | <i>G. max</i>               | Drought tolerance during vegetative growth | [32]       |
| 32     | <i>AtABF3</i>                                                           | <i>G. max</i>               | Drought                                    | [33]       |
| 33     | <i>GmBIN2</i>                                                           | <i>G. max</i>               | Drought                                    | [34]       |

|    |                                                                            |             |         |      |
|----|----------------------------------------------------------------------------|-------------|---------|------|
| 34 | NAC-Phvul.0,<br>NAC-Phvul.005G084500,<br>06G188900,<br>NAC-Phvul.009G15630 | Common bean | Drought | [35] |
|----|----------------------------------------------------------------------------|-------------|---------|------|

## References

1. Liu, Q.; Kasuga, M.; Sakuma, Y.; Abe, H.; Miura, S.; Yamaguchi-Shinozaki, K.; Shinozaki, K. Two transcription factors, DREB1 and DREB2, with an EREBP/AP2 DNA binding domain separate two cellular signal transduction pathways in drought- and low-temperature-responsive gene expression, respectively, in arabidopsis. *Plant Cell* **1998**, *10*, 1391–1406.
2. Sakuma, Y.; Maruyama, K.; Osakabe, Y.; Qin, F.; Seki, M.; Shinozaki, K.; Yamaguchi-Shinozaki, K. Functional analysis of an Arabidopsis transcription factor, DREB2A, involved in drought-responsive gene expression. *Plant Cell* **2006**, *18*, 1292–1309.
3. Uno, Y.; Furihata, T.; Abe, H.; Yoshida, R.; Shinozaki, K.; Yamaguchi-Shinozaki, K. Arabidopsis basic leucine zipper transcription factors involved in an abscisic acid-dependent signal transduction pathway under drought and high-salinity conditions. *Proc. Natl. Acad. Sci.* **2000**, *97*, 11632–11637.
4. Choi, H.; Hong, J.; Ha, J.; Kang, J.; Kim, S.Y. ABFs, a family of ABA-responsive element binding factors. *J. Biol. Chem.* **2000**, *275*, 1723–1730.
5. Kim, S.; Kang, J.; Cho, D.; Park, J.H.; Kim, S.Y. ABF2, an ABRE-binding bZIP factor, is an essential component of glucose signaling and its overexpression affects multiple stress tolerance. *Plant J.* **2004**, *40*, 75–87.
6. Kang, J.; Choi, H.; Im, M.; Kim, S.Y. Arabidopsis basic leucine zipper proteins that mediate stress-responsive abscisic acid signaling. *Plant Cell* **2002**, *14*, 343–357.
7. Abe, H.; Urao, T.; Ito, T.; Seki, M.; Shinozaki, K.; Yamaguchi-Shinozaki, K. Arabidopsis AtMYC2 (bHLH) and AtMYB2 (MYB) function as transcriptional activators in abscisic acid signaling. *Plant Cell* **2003**, *15*, 63–78.
8. Dubouzet, J.G.; Sakuma, Y.; Ito, Y.; Kasuga, M.; Dubouzet, E.G.; Miura, S.; Seki, M.; Shinozaki, K.; Yamaguchi-Shinozaki, K. OsDREB genes in rice, *Oryza sativa* L., encode transcription activators that function in drought-, high-salt-and cold-responsive gene expression. *Plant J.* **2003**, *33*, 751–763.
9. Tran, L.-S.P.; Nakashima, K.; Sakuma, Y.; Simpson, S.D.; Fujita, Y.; Maruyama, K.; Fujita, M.; Seki, M.; Shinozaki, K.; Yamaguchi-Shinozaki, K. Isolation and functional analysis of Arabidopsis stress-inducible NAC transcription factors that bind to a drought-responsive cis-element in the early responsive to dehydration stress 1 promoter. *Plant Cell* **2004**, *16*, 2481–2498.
10. Mattana, M.; Biazzi, E.; Consonni, R.; Locatelli, F.; Vannini, C.; Provera, S.; Coraggio, I. Overexpression of Osmyb4 enhances compatible solute accumulation and increases stress tolerance of *Arabidopsis thaliana*. *Physiol. Plant.* **2005**, *125*, 212–223.
11. Davletova, S.; Schlauch, K.; Coutu, J.; Mittler, R. The zinc-finger protein Zat12 plays a central role in reactive oxygen and abiotic stress signaling in arabidopsis. *Plant Physiol.* **2005**, *139*, 847–856.

12. Ding, Z.; Li, S.; An, X.; Liu, X.; Qin, H.; Wang, D. Transgenic expression of MYB15 confers enhanced sensitivity to abscisic acid and improved drought tolerance in *Arabidopsis thaliana*. *J. Genet. Genomics* **2009**, *36*, 17–29.
13. Dai, X.; Xu, Y.; Ma, Q.; Xu, W.; Wang, T.; Xue, Y.; Chong, K. Overexpression of an R1R2R3 MYB gene, OsMYB3R-2, increases tolerance to freezing, drought, and salt stress in transgenic *Arabidopsis*. *Plant Physiol.* **2007**, *143*, 1739–1751.
14. Qin, F.; Kakimoto, M.; Sakuma, Y.; Maruyama, K.; Osakabe, Y.; Tran, L.-S.P.; Shinozaki, K.; Yamaguchi-Shinozaki, K. Regulation and functional analysis of ZmDREB2A in response to drought and heat stresses in *Zea mays* L. *Plant J.* **2007**, *50*, 54–69.
15. Lu, P.-L.; Chen, N.-Z.; An, R.; Su, Z.; Qi, B.-S.; Ren, F.; Chen, J.; Wang, X.-C. A novel drought-inducible gene, ATAF1, encodes a NAC family protein that negatively regulates the expression of stress-responsive genes in *Arabidopsis*. *Plant Mol. Biol.* **2007**, *63*, 289–305.
16. Wang, Q.; Guan, Y.; Wu, Y.; Chen, H.; Chen, F.; Chu, C. Overexpression of a rice OsDREB1F gene increases salt, drought, and low temperature tolerance in both *Arabidopsis* and rice. *Plant Mol. Biol.* **2008**, *67*, 589–602.
17. Qiu, Y.; Yu, D. Over-expression of the stress-induced OsWRKY45 enhances disease resistance and drought tolerance in *Arabidopsis*. *Environ. Exp. Bot.* **2009**, *65*, 35–47.
18. Matsukura, S.; Mizoi, J.; Yoshida, T.; Todaka, D.; Ito, Y.; Maruyama, K.; Shinozaki, K.; Yamaguchi-Shinozaki, K. Comprehensive analysis of rice *DREB2*-type genes that encode transcription factors involved in the expression of abiotic stress-responsive genes. *Mol. Genet. Genomics* **2010**, *283*, 185–196.
19. Scharf, K.-D.; Berberich, T.; Ebersberger, I.; Nover, L. The plant heat stress transcription factor (Hsf) family: Structure, function and evolution. *Biochim. Biophys. Acta - Gene Regul. Mech.* **2012**, *1819*, 104–119.
20. Yer, E.N.; Baloglu, M.C.; Ayan, S. Identification and expression profiling of all Hsp family member genes under salinity stress in different poplar clones. *Gene* **2018**, *678*, 324–336.
21. Guenther, J.F.; Chanmanivone, N.; Galetovic, M.P.; Wallace, I.S.; Cobb, J.A.; Roberts, D.M. Phosphorylation of soybean nodulin 26 on serine 262 enhances water permeability and is regulated developmentally and by osmotic signals. *Plant Cell* **2003**, *15*, 981–991.
22. Li, X.-P.; Tian, A.-G.; Luo, G.-Z.; Gong, Z.-Z.; Zhang, J.-S.; Chen, S.-Y. Soybean DRE-binding transcription factors that are responsive to abiotic stresses. *Theor. Appl. Genet.* **2005**, *110*, 1355–1362.
23. Yoo, S.K.; Chung, K.S.; Kim, J.; Lee, J.H.; Hong, S.M.; Yoo, S.J.; Yoo, S.Y.; Lee, J.S.; Ahn, J.H. Constans activates suppressor of overexpression of constans 1 through Flowering Locus T to promote flowering in *Arabidopsis*. *Plant Physiol.* **2005**, *139*, 770–778.
24. Chen, M.; Wang, Q.-Y.; Cheng, X.-G.; Xu, Z.-S.; Li, L.-C.; Ye, X.-G.; Xia, L.-Q.; Ma, Y.-Z. *GmDREB2*, a soybean DRE-binding transcription factor, conferred drought and high-salt tolerance in transgenic plants. *Biochem. Biophys. Res. Commun.* **2007**, *353*, 299–305.
25. Liao, Y.; Zou, H.-F.; Wei, W.; Hao, Y.-J.; Tian, A.-G.; Huang, J.; Liu, Y.-F.; Zhang, J.-S.; Chen, S.-Y. Soybean *GmbZIP44*, *GmbZIP62* and *GmbZIP78* genes function as negative regulator of ABA signaling and confer salt and freezing tolerance in transgenic *Arabidopsis*. *Planta* **2008**, *228*, 225–240.
26. Liao, Y.; Zhang, J.; Chen, S.; Zhang, W. Role of soybean *GmbZIP132* under abscisic acid and salt stresses. *J. Integr. Plant Biol.* **2008**, *50*, 221–230.
27. Liao, Y.; Zou, H.-F.; Wang, H.-W.; Zhang, W.-K.; Ma, B.; Zhang, J.-S.; Chen, S.-Y. Soybean *GmMYB76*, *GmMYB92*, and *GmMYB177* genes confer stress tolerance in transgenic *Arabidopsis* plants. *Cell Res.* **2008**, *18*, 1047–1060.

28. Tan, D.X.; Tuong, H.M.; Thuy, V.T.T.; Son, L. Van; Mau, C.H. Cloning and overexpression of GmDREB2 gene from a Vietnamese drought-resistant soybean variety. *Brazilian Arch. Biol. Technol.* **2015**, *58*, 651–657.
29. Li, Y.; Chen, Q.; Nan, H.; Li, X.; Lu, S.; Zhao, X.; Liu, B.; Guo, C.; Kong, F.; Cao, D. Overexpression of GmFDL19 enhances tolerance to drought and salt stresses in soybean. *PLoS One* **2017**, *12*, e0179554.
30. Chen, Y.; Chi, Y.; Meng, Q.; Wang, X.; Yu, D. GmSK1, an SKP1 homologue in soybean, is involved in the tolerance to salt and drought. *Plant Physiol. Biochem.* **2018**, *127*, 25–31.
31. An, J.; Cheng, C.; Hu, Z.; Chen, H.; Cai, W.; Yu, B. The Panax ginseng PgTIP1 gene confers enhanced salt and drought tolerance to transgenic soybean plants by maintaining homeostasis of water, salt ions and ROS. *Environ. Exp. Bot.* **2018**, *155*, 45–55.
32. Li, D.-H.; Chen, F.-J.; Li, H.-Y.; Li, W.; Guo, J.-J. The soybean GmRACK1 gene plays a role in drought tolerance at vegetative stages. *Russ. J. Plant Physiol.* **2018**, *65*, 541–552.
33. Nam, K.-H.; Kim, D.Y.; Kim, H.J.; Pack, I.-S.; Kim, H.J.; Chung, Y.S.; Kim, S.Y.; Kim, C.-G. Global metabolite profiling based on GC–MS and LC–MS/MS analyses in ABF3-overexpressing soybean with enhanced drought tolerance. *Appl. Biol. Chem.* **2019**, *62*, 15.
34. Wang, L.; Chen, Q.; Xin, D.; Qi, Z.; Zhang, C.; Li, S.; Jin, Y.; Li, M.; Mei, H.; Su, A.; et al. Overexpression of GmBIN2, a soybean glycogen synthase kinase 3 gene, enhances tolerance to salt and drought in transgenic Arabidopsis and soybean hairy roots. *J. Integr. Agric.* **2018**, *17*, 1959–1971.
35. Wu, J.; Wang, L.; Wang, S. Comprehensive analysis and discovery of drought-related NAC transcription factors in common bean. *BMC Plant Biol.* **2016**, *16*, 193.
